# Supplementary material for: Base moiety selectivity in cleavage of short oligoribonucleotides by di- and tri-nuclear Zn(II) complexes of azacrown-derived ligands
Source: Royal Society of Chemistry journal article supplement (doi:10.1039/b904828f), 2009-01-01
Supplement: b904828f.pdf [file b904828f.pdf]

# Supporting Information

for

## Base Moiety Selectivity in Cleavage of Short Oligoribonucleotides by Di- and Tri-nuclear Zn(II) Complexes of Azacrown-derived Ligands

Maarit Laine, Kaisa Ketomäki, Päivi Poijärvi-Virta,\* and Harri Lönnberg

### Table of contents

|                              |    |
|------------------------------|----|
| 1. General                   | 1  |
| 2. Cleavage of 5'-CUACUA-3'  | 2  |
| 3. Cleavage of 5'-CAGGCA-3'  | 3  |
| 4. Cleavage of 5'-CAAGAC-3'  | 4  |
| 5. Cleavage of 5'-CAGUCA-3'  | 5  |
| 6. Cleavage of 5'-CGACGA-3'  | 6  |
| 7. Cleavage of 5'-CGAGCA-3'  | 7  |
| 8. Cleavage of 5'-CAUUCA-3'  | 8  |
| 9. Cleavage of 5'-CAAUAC-3'  | 9  |
| 10. Cleavage of 5'-CAAUAC-3' | 10 |

### 1. General

The cleavage products were purified by RP-HPLC on a Hypersil ODS column (250 x 4.6 mm, particle size 5  $\mu\text{m}$ ; flow rate 1 mL min<sup>-1</sup>; buffer A = 0.05 mol L<sup>-1</sup> NH<sub>4</sub>OAc and B = A containing 50 % MeCN). Mass spectra were verified on a Bruker micrOTOF-Q ESI-MS system.

## 2. Cleavage of 5'-CUACUA-3'

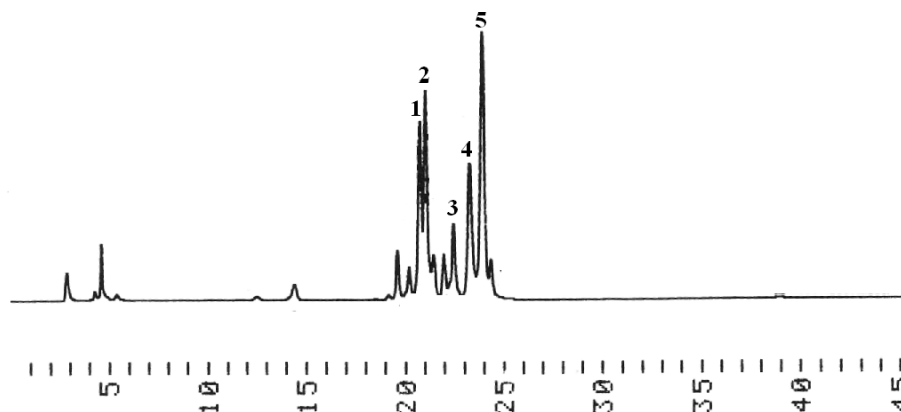

**Figure 1.** RP-HPLC chromatogram for the cleavage of the sequence 5'-CUACUA-3' in the presence of  $(\text{Zn}^{2+})_3\text{L}^3$ .

**Table 1.** Mass spectrometric and RP-HPLC analysis for the cleavage products of sequence 5'-CUACUA-3' promoted by  $(\text{Zn}^{2+})_3\text{L}^3$ .

| Peak | Sequence     | $t_R$ / min | Observed masses<br>$m/z$                                                                                                                                 | Calculated masses<br>$m/z$       |
|------|--------------|-------------|----------------------------------------------------------------------------------------------------------------------------------------------------------|----------------------------------|
| 1    | 5'-CUACp-3'  | 20.16       | 1262.2 $[\text{M} - \text{H}]^-$<br>630.6 $[\text{M} - 2\text{H}]^{2-}$<br>420.1 $[\text{M} - 3\text{H}]^{3-}$                                           | 1262.8<br>630.9<br>420.2         |
| 2    | 5'-CUACUp-3' | 20.99       | 783.6 $[\text{M} - 2\text{H}]^{2-}$<br>522.1 $[\text{M} - 3\text{H}]^{3-}$<br>391.3 $[\text{M} - 4\text{H}]^{4-}$                                        | 784.0<br>522.3<br>391.5          |
| 3    | A**          | 22.50       |                                                                                                                                                          |                                  |
| 4    | 5'-CUACUA-3' | 23.24       | 908.1 $[\text{M} - 2\text{H}]^{2-}$<br>605.1 $[\text{M} - 3\text{H}]^{3-}$<br>453.6 $[\text{M} - 4\text{H}]^{4-}$<br>362.7 $[\text{M} - 5\text{H}]^{5-}$ | 908.6<br>605.4<br>453.8<br>362.8 |
| 5    | 5'-UA-3'     | 23.88       | 572.1 $[\text{M} - \text{H}]^-$                                                                                                                          | 572.4                            |

\*\*Based on the HPLC analysis with the adenosine reference sample.

### 3. Cleavage of 5'-CAGGCA-3'

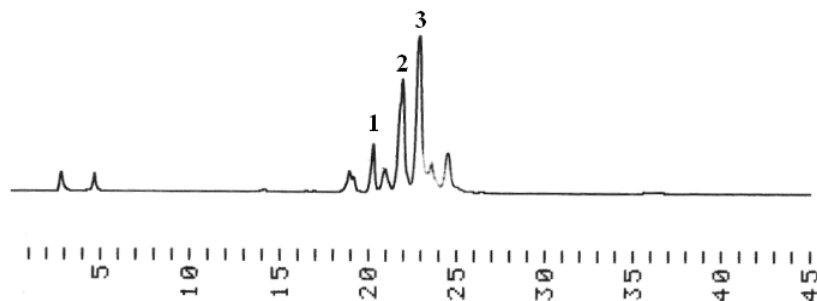

**Figure 2.** RP-HPLC chromatogram for the cleavage of the sequence 5'-CAGGCA-3' in the presence of  $(\text{Zn}^{2+})_3\text{L}^3$ .

**Table 2.** Mass spectrometric and RP-HPLC analysis for the cleavage products of sequence 5'-CAGGCA-3' promoted by  $(\text{Zn}^{2+})_3\text{L}^3$ .

| Peak | Sequence     | $t_R$ / min | Observed masses<br>$m/z$                                                                                          | Calculated masses<br>$m/z$ |
|------|--------------|-------------|-------------------------------------------------------------------------------------------------------------------|----------------------------|
| 1    | 5'-CAGp-3'   | 20.27       | 996.2 $[\text{M} - \text{H}]^-$<br>497.6 $[\text{M} - 2\text{H}]^{2-}$                                            | 996.6<br>497.8             |
| 2    | 5'-GCA-3'    | 21.92       | 916.2 $[\text{M} - \text{H}]^-$<br>457.6 $[\text{M} - 2\text{H}]^{2-}$                                            | 916.6<br>457.8             |
| 3    | 5'-CAGGCA-3' | 22.91       | 947.2 $[\text{M} - 2\text{H}]^{2-}$<br>631.1 $[\text{M} - 3\text{H}]^{3-}$<br>473.1 $[\text{M} - 4\text{H}]^{4-}$ | 947.6<br>631.4<br>473.3    |

#### 4. Cleavage of 5'-CAAGAC-3'

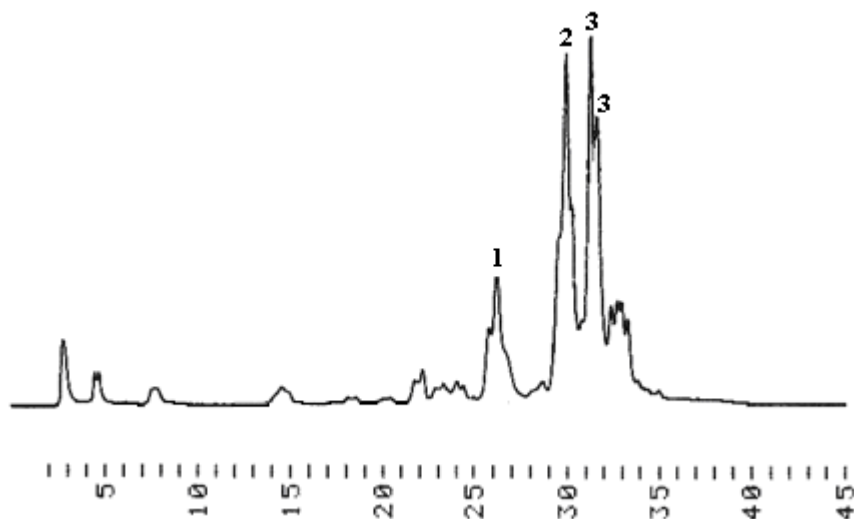

**Figure 3.** RP-HPLC chromatogram for the cleavage of the sequence 5'-CAAGAC-3' in the presence of  $(\text{Zn}^{2+})_3\text{L}^3$ .

**Table 3.** Mass spectrometric and RP-HPLC analysis for the cleavage products of sequence 5'-CAAGAC-3' promoted by  $(\text{Zn}^{2+})_3\text{L}^3$ .

| Peak | Sequence                  | $t_R$ / min | Observed masses<br>$m/z$                                                                                                                                 | Calculated masses<br>$m/z$       |
|------|---------------------------|-------------|----------------------------------------------------------------------------------------------------------------------------------------------------------|----------------------------------|
| 1    | 5'-CAAGp-3'               | 25.79       | 662.1 $[\text{M} - 2\text{H}]^{2-}$<br>441.1 $[\text{M} - 3\text{H}]^{3-}$                                                                               | 662.4<br>441.3                   |
| 2    | *5'-AC-3' ja<br>5'-GAC-3' | 29.90       | *571.1 $[\text{M} - \text{H}]^-$<br>916.2 $[\text{M} - \text{H}]^-$<br>457.6 $[\text{M} - 2\text{H}]^{2-}$                                               | *571.4<br>916.6<br>457.8         |
| 3    | 5'-CAAGAC-3'              | 31.23       | 939.2 $[\text{M} - 2\text{H}]^{2-}$<br>625.8 $[\text{M} - 3\text{H}]^{3-}$<br>469.1 $[\text{M} - 4\text{H}]^{4-}$<br>375.1 $[\text{M} - 5\text{H}]^{5-}$ | 939.6<br>626.1<br>469.3<br>375.2 |

## 5. Cleavage of 5'-CAGUCA-3'

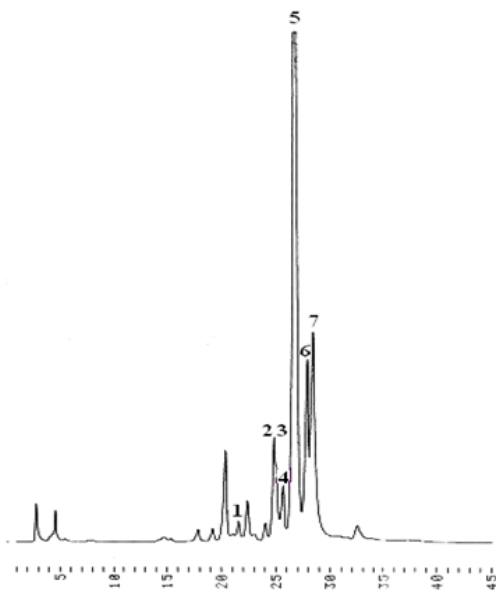

**Figure 4.** RP-HPLC chromatogram for the cleavage of the sequence 5'-CAGUCA-3' in the presence of  $(\text{Zn}^{2+})_3\text{L}^3$ .

**Table 4.** Mass spectrometric and RP-HPLC analysis for the cleavage products of sequence 5'-CAGUCA-3' promoted by  $(\text{Zn}^{2+})_3\text{L}^3$ .

| Peak | Sequence     | $t_R$ / min | Observed masses<br>$m/z$                                                                                                                                 | Calculated masses<br>$m/z$       |
|------|--------------|-------------|----------------------------------------------------------------------------------------------------------------------------------------------------------|----------------------------------|
| 1    | 5'-CAGp-3'   | 21.06       | 497.6 $[\text{M} - 2\text{H}]^{2-}$<br>331.4 $[\text{M} - 3\text{H}]^{3-}$                                                                               | 497.8<br>331.5                   |
| 2    | 5'-CA-3'     | 24.82       | 571.1 $[\text{M} - \text{H}]^-$                                                                                                                          | 571.4                            |
| 3    | 5'-CAp-3'    | 25.00       | 325.2 $[\text{M} - 2\text{H}]^{2-}$                                                                                                                      | 325.2                            |
| 4    | 5'-CAGUp-3'  | 25.67       | 650.6 $[\text{M} - 2\text{H}]^{2-}$<br>433.4 $[\text{M} - 3\text{H}]^{3-}$                                                                               | 650.9<br>433.6                   |
| 5    | 5'-UCA-3'    | 26.75       | 877.2 $[\text{M} - \text{H}]^-$<br>438.1 $[\text{M} - 2\text{H}]^{2-}$                                                                                   | 877.6<br>438.3                   |
| 6    | 5'-GUCA      | 27.86       | 1222.2 $[\text{M} - \text{H}]^-$<br>610.6 $[\text{M} - 2\text{H}]^{2-}$<br>406.7 $[\text{M} - 3\text{H}]^{3-}$                                           | 1222.8<br>610.9<br>406.9         |
| 7    | 5'-CAGUCA-3' | 28.38       | 927.6 $[\text{M} - 2\text{H}]^{2-}$<br>618.1 $[\text{M} - 3\text{H}]^{3-}$<br>463.3 $[\text{M} - 4\text{H}]^{4-}$<br>370.5 $[\text{M} - 5\text{H}]^{5-}$ | 928.1<br>618.4<br>463.5<br>370.6 |

## 6. Cleavage of 5'-CGACGA-3'

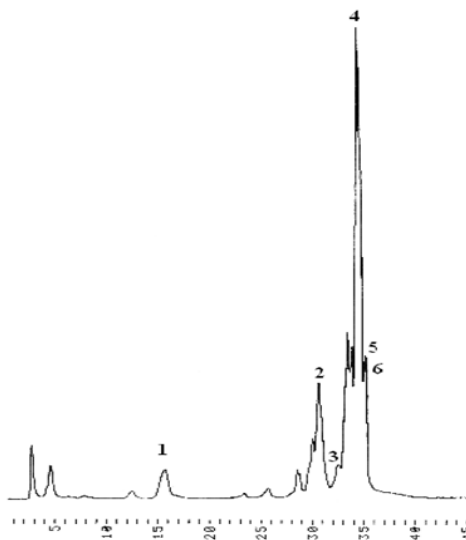

**Figure 5.** RP-HPLC chromatogram for the cleavage of the sequence 5'-CGACGA-3' in the presence of  $(\text{Zn}^{2+})_3\text{L}^3$ .

**Table 5.** Mass spectrometric and RP-HPLC analysis for the cleavage products of sequence 5'-CGACGA-3' promoted by  $(\text{Zn}^{2+})_3\text{L}^3$ .

| Peak | Sequence                           | $t_R$ / min | Observed masses<br>$m/z$                                                                                                                                        | Calculated masses<br>$m/z$                      |
|------|------------------------------------|-------------|-----------------------------------------------------------------------------------------------------------------------------------------------------------------|-------------------------------------------------|
| 1    | 5'-CGp-3'                          | 15.71       | 667.1 [M - H] <sup>-</sup><br>333.0 [M - 2H] <sup>2-</sup>                                                                                                      | 667.4<br>333.2                                  |
| 2    | *5'-CGACGp-3'<br>and<br>5'-CGACp-3 | 30.56       | *822.6 [M - 2H] <sup>2-</sup><br>*548.1 [M - 3H] <sup>3-</sup><br>*410.8 [M - 4H] <sup>4-</sup><br>650.1 [M - 2H] <sup>2-</sup><br>433.0 [M - 3H] <sup>3-</sup> | * 823.0<br>* 548.3<br>* 411.0<br>650.4<br>433.3 |
| 3    | A**                                | 32.54       |                                                                                                                                                                 |                                                 |
| 4    | 5'-CGACGA-3'                       | 34.11       | 947.1 [M - 2H] <sup>2-</sup><br>631.1 [M - 3H] <sup>3-</sup><br>473.1 [M - 4H] <sup>4-</sup>                                                                    | 947.6<br>631.4<br>473.3                         |
| 5    | *5'-ACGA-3'<br>and<br>5'-GACGA-3'  | 35.04       | *622.1 [M - 2H] <sup>2-</sup><br>*414.4 [M - 3H] <sup>3-</sup><br>794.6 [M - 2H] <sup>2-</sup><br>529.4 [M - 3H] <sup>3-</sup><br>396.8 [M - 4H] <sup>4-</sup>  | * 622.4<br>* 414.6<br>795.0<br>529.7<br>397.0   |
| 6    | 5'-GA-3'                           | 35.23       | 611.1 [M - H] <sup>-</sup>                                                                                                                                      | 611.4                                           |

\*\*Based on the HPLC analysis with the adenosine reference sample.

## 7. Cleavage of 5'-CGAGCA-3'

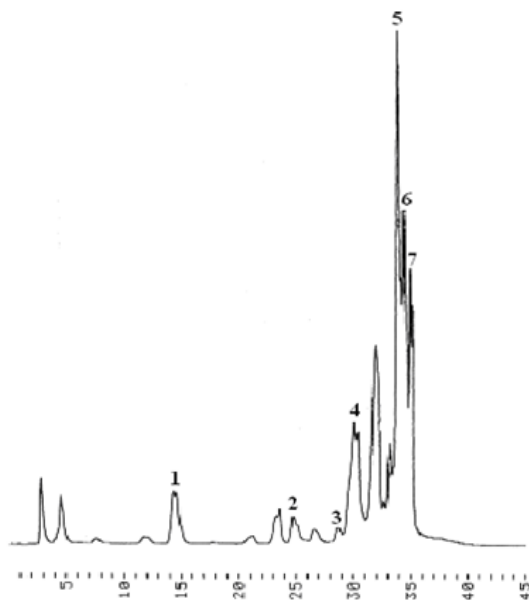

**Figure 6.** RP-HPLC chromatogram for the cleavage of the sequence 5'-CGAGCA-3' in the presence of  $(\text{Zn}^{2+})_3\text{L}^3$ .

**Table 6.** Mass spectrometric and RP-HPLC analysis for the cleavage products of sequence 5'-CGAGCA-3' promoted by  $(\text{Zn}^{2+})_3\text{L}^3$ .

| Peak | Sequence                            | $t_R$ / min | Observed masses<br>$m/z$                                                                                                                                                                                                                                                         | Calculated masses<br>$m/z$                                     |
|------|-------------------------------------|-------------|----------------------------------------------------------------------------------------------------------------------------------------------------------------------------------------------------------------------------------------------------------------------------------|----------------------------------------------------------------|
| 1    | 5'-CGp-3'                           | 14.30       | 667.1 $[\text{M} - \text{H}]^-$<br>333.0 $[\text{M} - 2\text{H}]^{2-}$                                                                                                                                                                                                           | 667.4<br>333.2                                                 |
| 2    | 5'-CGAp-3'                          | 24.76       | 497.6 $[\text{M} - 2\text{H}]^{2-}$<br>331.4 $[\text{M} - 3\text{H}]^{3-}$                                                                                                                                                                                                       | 497.8<br>331.5                                                 |
| 3    | 5'-CGAGp-3'                         | 28.71       | 670.1 $[\text{M} - 2\text{H}]^{2-}$<br>446.2 $[\text{M} - 3\text{H}]^{3-}$                                                                                                                                                                                                       | 670.4<br>446.6                                                 |
| 4    | 5'-CA-3'                            | 30.06       | 571.1 $[\text{M} - \text{H}]^-$                                                                                                                                                                                                                                                  | 571.4                                                          |
| 5    | 5'-GCA-3'                           | 33.71       | 916.2 $[\text{M} - \text{H}]^-$<br>457.6 $[\text{M} - 2\text{H}]^{2-}$                                                                                                                                                                                                           | 916.6<br>457.8                                                 |
| 6    | *5'-GAGCA-3'<br>and<br>5'-CGAGCA-3' | 34.27       | *794.6 $[\text{M} - 2\text{H}]^{2-}$<br>*529.4 $[\text{M} - 3\text{H}]^{3-}$<br>*396.8 $[\text{M} - 4\text{H}]^{4-}$<br>947.2 $[\text{M} - 2\text{H}]^{2-}$<br>631.1 $[\text{M} - 3\text{H}]^{3-}$<br>473.1 $[\text{M} - 4\text{H}]^{4-}$<br>378.3 $[\text{M} - 5\text{H}]^{5-}$ | *795.0<br>*529.7<br>*397.0<br>947.6<br>631.4<br>473.3<br>378.4 |
| 7    | 5'-AGCA-3'                          | 34.54       | 1245.2 $[\text{M} - \text{H}]^-$<br>622.1 $[\text{M} - 2\text{H}]^{2-}$<br>414.4 $[\text{M} - 3\text{H}]^{3-}$                                                                                                                                                                   | 1245.8<br>622.4<br>414.6                                       |

## 8. Cleavage of 5'-CAUUCA-3'

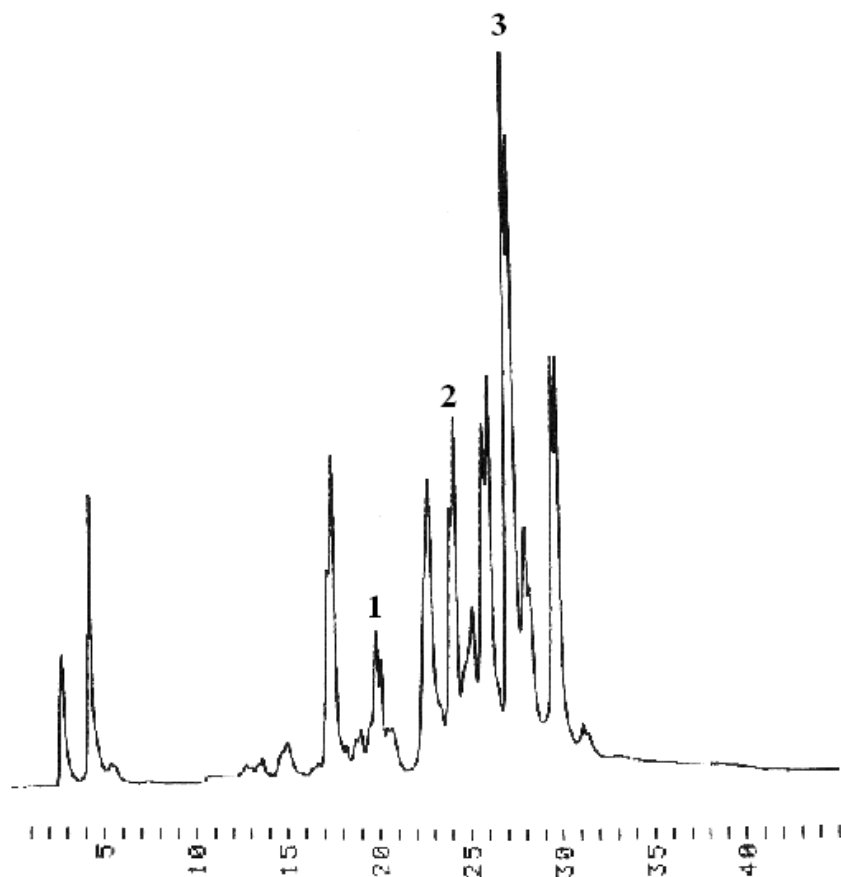

**Figure 7.** RP-HPLC chromatogram for the cleavage of the sequence 5'-CAUUCA-3' in the presence of  $(\text{Zn}^{2+})_3\text{L}^3$ .

**Table 7.** Mass spectrometric and RP-HPLC analysis for the cleavage products of sequence 5'-CAUUCA-3' promoted by  $(\text{Zn}^{2+})_3\text{L}^3$ .

| Peak | Sequence     | $t_R$ / min | Observed masses<br>$m/z$                                                                                          | Calculated masses<br>$m/z$ |
|------|--------------|-------------|-------------------------------------------------------------------------------------------------------------------|----------------------------|
| 1    | 5'-CAUp-3'   | 19.90       | 957.1 $[\text{M} - \text{H}]^-$<br>478.1 $[\text{M} - 2\text{H}]^{2-}$<br>318.4 $[\text{M} - 3\text{H}]^{3-}$     | 957.6<br>478.3<br>318.5    |
| 2    | 5'-UCA-3'    | 24.27       | 877.2 $[\text{M} - \text{H}]^-$<br>438.1 $[\text{M} - 2\text{H}]^{2-}$                                            | 877.6<br>438.3             |
| 3    | 5'-CAUUCA-3' | 27.15       | 908.2 $[\text{M} - 2\text{H}]^{2-}$<br>605.1 $[\text{M} - 3\text{H}]^{3-}$<br>453.6 $[\text{M} - 4\text{H}]^{4-}$ | 908.6<br>605.4<br>453.8    |



## 9. Cleavage of 5'-CAAUAC-3'

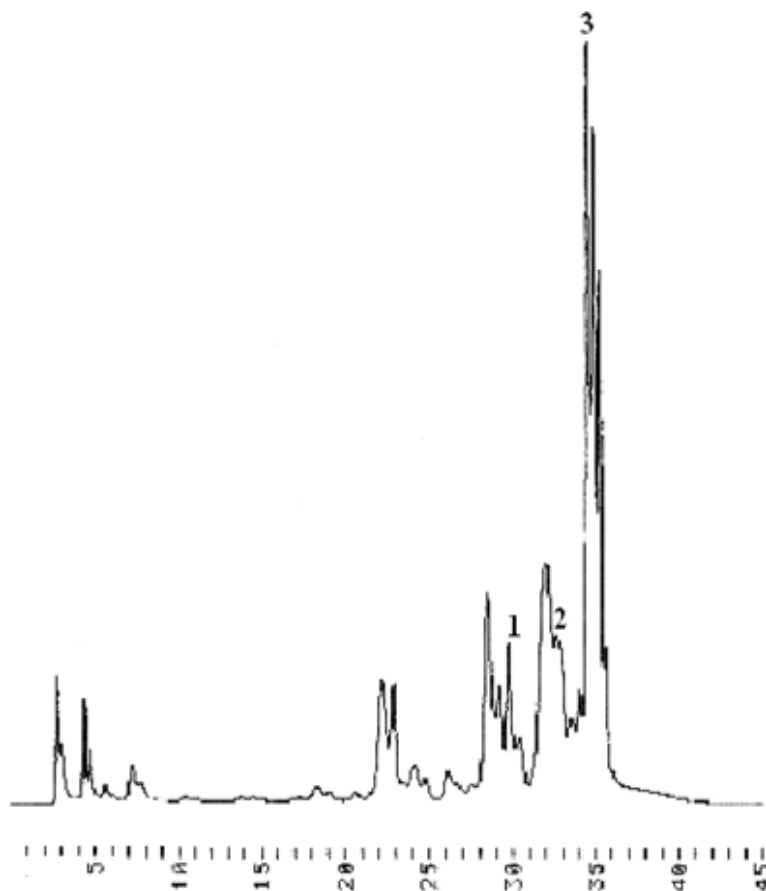

**Figure 8.** RP-HPLC chromatogram for the cleavage of the sequence 5'-CAAUAC-3' in the presence of  $(\text{Zn}^{2+})_3\text{L}^3$ .

**Table 8.** Mass spectrometric and RP-HPLC analysis for the cleavage products of sequence 5'-CAAUAC-3' promoted by  $(\text{Zn}^{2+})_3\text{L}^3$ .

| Peak | Sequence     | $t_R$ / min | Observed masses<br>$m/z$                                                                                                                                 | Calculated masses<br>$m/z$       |
|------|--------------|-------------|----------------------------------------------------------------------------------------------------------------------------------------------------------|----------------------------------|
| 1    | 5'-CAAUp-3'  | 29.72       | 642.6 $[\text{M} - 2\text{H}]^{2-}$<br>428.0 $[\text{M} - 3\text{H}]^{3-}$                                                                               | 642.9<br>428.3                   |
| 2    | 5'-AC-3'     | 32.59       | 571.1 $[\text{M} - \text{H}]$                                                                                                                            | 571.4                            |
| 3    | 5'-CAAUAC-3' | 34.35       | 919.6 $[\text{M} - 2\text{H}]^{2-}$<br>612.8 $[\text{M} - 3\text{H}]^{3-}$<br>459.3 $[\text{M} - 4\text{H}]^{4-}$<br>367.3 $[\text{M} - 5\text{H}]^{5-}$ | 920.1<br>613.1<br>459.5<br>367.4 |

## 10. Cleavage of 5'-CAAUAC-3'

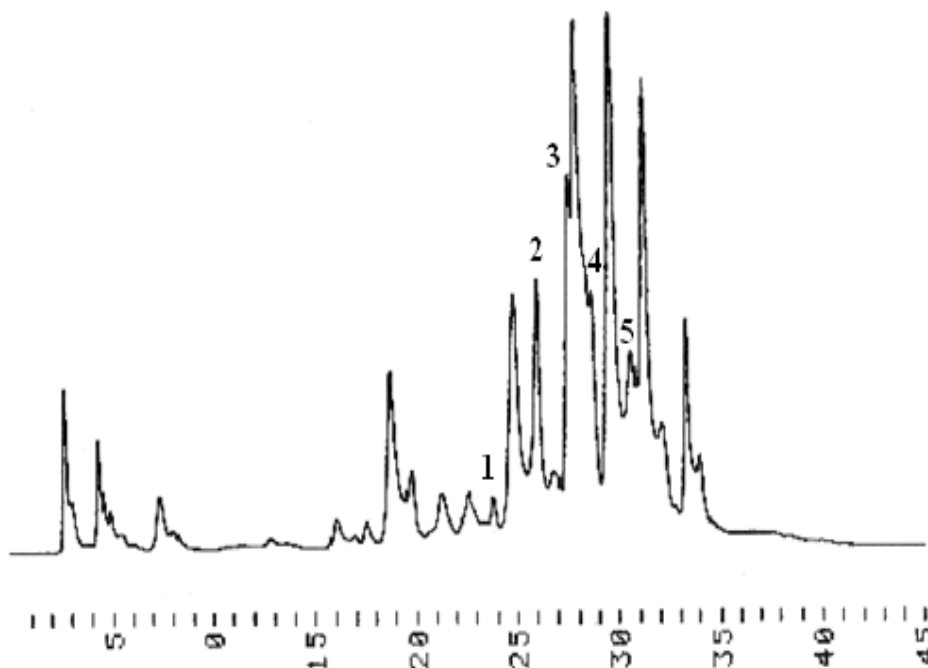

**Figure 9.** RP-HPLC chromatogram for the cleavage of the sequence 5'-CAAUAC-3' in the presence of  $(\text{Zn}^{2+})_2\text{L}^1$ .

**Table 9.** Mass spectrometric and RP-HPLC analysis for the cleavage products of sequence 5'-CAAUAC-3' promoted by  $(\text{Zn}^{2+})_2\text{L}^1$ .

| Peak | Sequence     | $t_R$ / min | Observed masses<br>$m/z$                                                                                          | Calculated masses<br>$m/z$ |
|------|--------------|-------------|-------------------------------------------------------------------------------------------------------------------|----------------------------|
| 1    | 5'-CAAp-3'   | 23.75       | 980.6 $[\text{M} - \text{H}]^-$<br>489.6 $[\text{M} - 2\text{H}]^{2-}$<br>326.0 $[\text{M} - 3\text{H}]^{3-}$     | 980.6<br>489.8<br>326.2    |
| 2    | 5'-CAAUp-3'  | 26.00       | 642.6 $[\text{M} - 2\text{H}]^{2-}$<br>428.1 $[\text{M} - 3\text{H}]^{3-}$<br>320.0 $[\text{M} - 4\text{H}]^{4-}$ | 642.9<br>428.3<br>320.9    |
| 3    | 5'-UAC-3'    | 27.52       | 877.2 $[\text{M} - \text{H}]^-$<br>438.1 $[\text{M} - 2\text{H}]^{2-}$                                            | 877.6<br>438.3             |
| 4    | 5'-AC-3'     | 28.00       | 571.1 $[\text{M} - \text{H}]^-$                                                                                   | 571.4                      |
| 5    | 5'-CAAUAC-3' | 30.64       | 919.6 $[\text{M} - 2\text{H}]^{2-}$<br>612.8 $[\text{M} - 3\text{H}]^{3-}$<br>459.3 $[\text{M} - 4\text{H}]^{4-}$ | 920.1<br>613.1<br>459.5    |
